# Supplementary material
Source: HighWire-hosted journal article supplement (https://www.life-science-alliance.org/content/4/9/e202000962/F5)

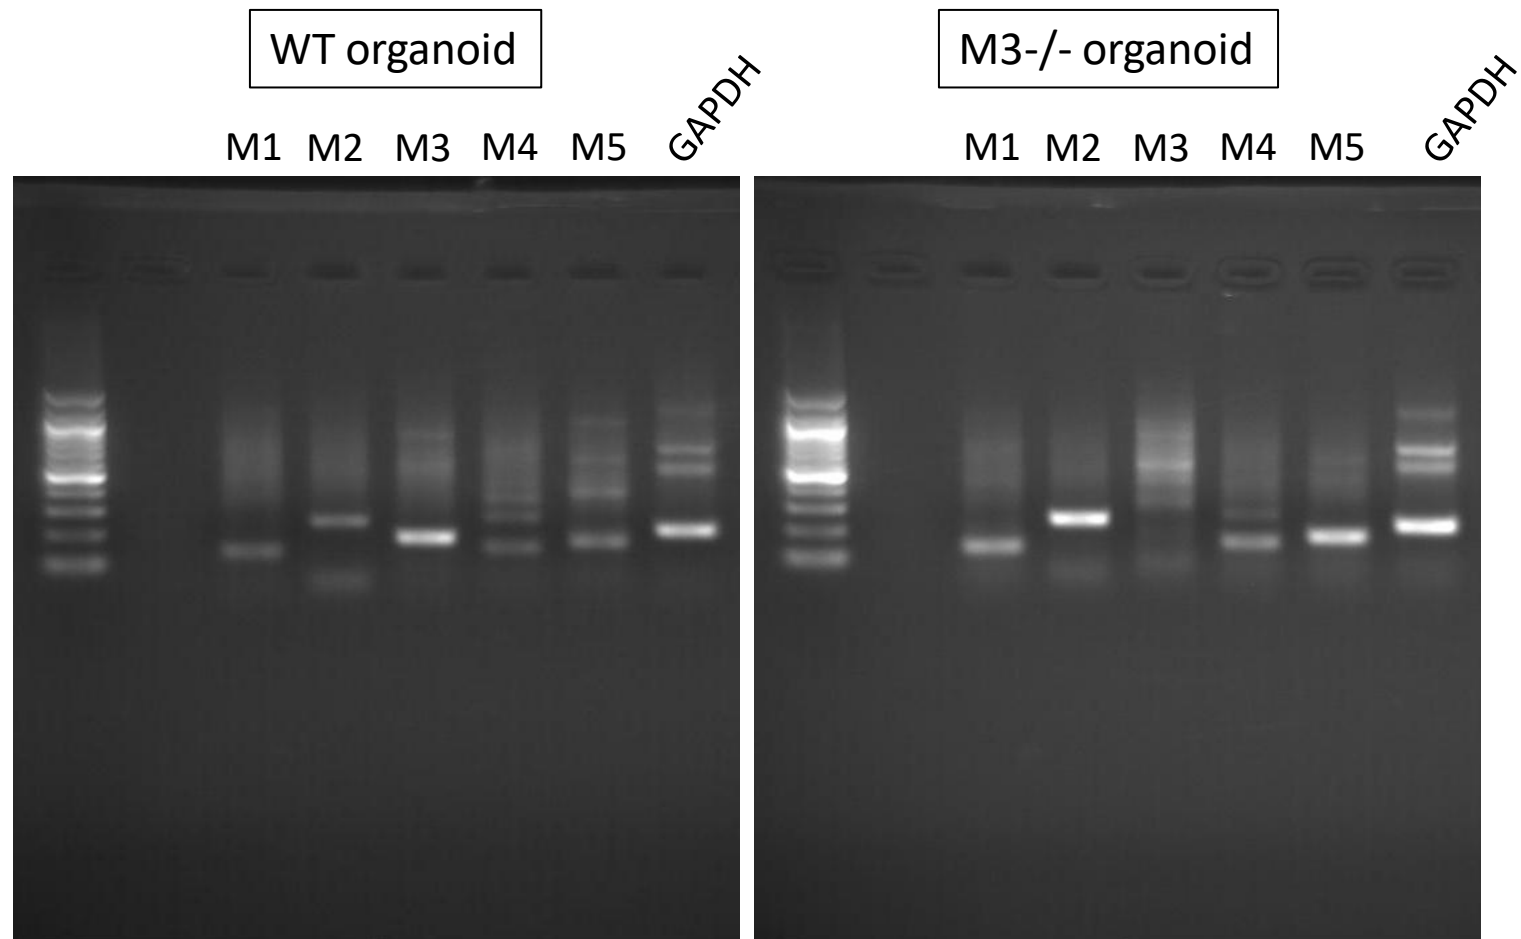

Fig 3A

Supplement: inline-supplementary-material-5 [file inline-supplementary-material-5.zip]
